# Supplementary material for: Transovarial transmission of Anaplasma phagocytophilum in Haemaphysalis ticks under field conditions
Source: Research Square preprint supplement (doi:10.21203/rs.3.rs-5275154/v1), 2024-10-18
Supplement: Supplementary file 1 [file 8a8fdbdd5b60774ebd3ea598.xlsx]

## Sheet: Table S1
	Table S1. Monthly collection of Haemaphysalis tick stages
				Months
	Species		Stage	Mar	Apr	May	Jun	Jul	Aug	Sep	Oct	Total
	Haemaphysalis sp.		Larva	7 (0.0)	86 (0.2)	873 (2.4)	446 (1.2)	2,644 (7.2)	4,347 (11.8)	6,433 (17.4)	5,144 (13.9)	19,980 (54.1)
	Haemapysalis longicornis		Nymph	487 (1.3)	3,157 (8.6)	3,427 (9.3)	3,183 (8.6)	1,483 (4.0)	303 (0.8)	76 (0.2)	73 (0.2)	12,189 (33.0)
			Female	3 (0.0)	15 (0.0)	55 (0.1)	158 (0.4)	353 (1.0)	118 (0.3)	16 (0.0)	0 (0.0)	718 (1.9)
			Male	0 (0.0)	1 (0.0)	10 (0.0)	46 (0.1)	97 (0.3)	18 (0.0)	3 (0.0)	0 (0.0)	175 (0.5)
		Subtotal		490 (1.3)	3,173 (8.6)	3,492 (9.5)	3,387 (9.2)	1,933 (5.2)	439 (1.2)	95 (0.3)	73 (0.2)	13,082 (35.4)
	Haemaphysalis flava		Nymph	1,352 (3.7)	1,059 (2.9)	354 (1.0)	174 (0.5)	31 (0.1)	72 (0.2)	92 (0.2)	175 (0.5)	3,309 (9.0)
			Female	162 (0.4)	66 (0.2)	39 (0.1)	9 (0.0)	1 (0.0)	1 (0.0)	0 (0.0)	11 (0.0)	289 (0.8)
			Male	135 (0.4)	63 (0.2)	28 (0.1)	5 (0.0)	0 (0.0)	0 (0.0)	1 (0.0)	20 (0.1)	252 (0.7)
		Subtotal		1,649 (4.5)	1,188 (3.2)	421 (1.1)	188 (0.5)	32 (0.1)	73 (0.2)	93 (0.3)	206 (0.6)	3,850 (10.4)
	Combined		Larva	7 (0.0)	86 (0.2)	873 (2.4)	446 (1.2)	2,644 (7.2)	4,347 (11.8)	6,433 (17.4)	5,144 (13.9)	19,980 (54.1)
			Nymph	1,839 (5.0)	4,216 (11.4)	3,781 (10.2)	3,357 (9.1)	1,514 (4.1)	375 (1.0)	168 (0.5)	248 (0.7)	15,498 (42.0)
			Female	165 (0.4)	81 (0.2)	94 (0.3)	167 (0.5)	354 (1.0)	119 (0.3)	16 (0.0)	11 (0.0)	1,007 (2.7)
			Male	135 (0.4)	64 (0.2)	38 (0.1)	51 (0.1)	97 (0.3)	18 (0.0)	4 (0.0)	20 (0.1)	427 (1.2)
		Total		2,146 (5.8)	4,447 (12.0)	4,786 (13.0)	4,021 (10.9)	4,609 (12.5)	4,859 (13.2)	6,621 (17.9)	5,423 (14.7)	36,912 (100.0)
